# Supplementary material for: White matter diffusion estimates in obsessive-compulsive disorder across 1,653 individuals: Machine learning findings from the ENIGMA OCD Working Group
Source: Research Square preprint supplement (doi:10.21203/rs.3.rs-2749722/v1), 2023-06-30
Supplement: Supplementary file 1 [file 34f98eea09d9e6c4a914702c.pdf]

**Table 1. Demographic and clinical characteristics of patients with obsessive-compulsive disorder (OCD) and healthy controls (HCs).**

| Characteristics                                                                                                          | Adult OCD sample<br>(n = 690) | Adult HC sample<br>(n = 646) | Pediatric OCD<br>sample<br>(n = 175) | Pediatric HC<br>sample<br>(n = 142) |
|--------------------------------------------------------------------------------------------------------------------------|-------------------------------|------------------------------|--------------------------------------|-------------------------------------|
| <b>Demographic Characteristics</b>                                                                                       |                               |                              |                                      |                                     |
| Age (years)                                                                                                              | 31.6± 9.78                    | 30.8± 9.97                   | 14.5±2.3                             | 14.3±2.4                            |
| Male N (%)                                                                                                               | 397 (25.6)                    | 380 (24.2)                   | 97 (27.8)                            | 77 (22.1)                           |
| <b>Clinical Characteristics</b>                                                                                          |                               |                              |                                      |                                     |
| OCD illness severity score                                                                                               | 25± 7.11                      |                              | 20.8±8.0                             |                                     |
| Childhood-onset N (%)                                                                                                    | 351 (51.7)                    |                              |                                      |                                     |
| Duration of illness                                                                                                      | 12.4± 11.1                    |                              | 3.0±2.5                              |                                     |
| Medication use at time of scan N (%)                                                                                     | 261 (37.8)                    |                              | 105 (60)                             |                                     |
| <b>Lifetime diagnosis</b>                                                                                                |                               |                              |                                      |                                     |
| Anxiety                                                                                                                  | 76 (11.02)                    |                              | 48 (27.4)                            |                                     |
| Major depression                                                                                                         | 84 (12.17)                    |                              | 18 (10.3)                            |                                     |
| <b>Current comorbid disorders</b>                                                                                        |                               |                              |                                      |                                     |
| Anxiety                                                                                                                  | 69 (10.0)                     |                              | 29 (16.6)                            |                                     |
| Major depression                                                                                                         | 77 (11.2)                     |                              | 6 (3.4)                              |                                     |
| <b>OCD symptom dimension</b>                                                                                             |                               |                              |                                      |                                     |
| Aggressive/checking                                                                                                      | 411 (59.6)                    |                              | 73 (41.7)                            |                                     |
| Contamination/cleaning                                                                                                   | 355 (51.5)                    |                              | 62 (35.4)                            |                                     |
| Symmetry/ordering                                                                                                        | 370 (53.6)                    |                              | 68 (38.9)                            |                                     |
| Sexual/religious                                                                                                         | 228 (33.0)                    |                              | 55 (31.43)                           |                                     |
| Hoarding                                                                                                                 | 114 (16.5)                    |                              | 47 (26.9)                            |                                     |
| Symptom score was indicated by total score on the adult and child version of the Yale-Brown Obsessive Compulsive Scales. |                               |                              |                                      |                                     |
| OCD symptom dimensions were measured with the YBOCS symptom checklist.                                                   |                               |                              |                                      |                                     |
