# Supplementary material for: White matter diffusion estimates in obsessive-compulsive disorder across 1,653 individuals: Machine learning findings from the ENIGMA OCD Working Group
Source: Research Square preprint supplement (doi:10.21203/rs.3.rs-2749722/v1), 2023-06-30
Supplement: Supplementary file 1 [file f130c4ce7537841a2964ca25.docx]

Supplementary Materials

[**Supplementary Table 1.** Demographic and clinical characteristics of each site.](#_heading=h.32hioqz)

**Supplementary Table 2**. Demographic and clinical characteristics of discovery and replication sets.

[**Supplementary Table 3**. Performance of OCD classification applied NeuroComBat harmonization with covariates (age, sex).](#_heading=h.41mghml)

[**Supplementary Table 4.** Top 10 features of diagnosis classification models](#_heading=h.3tbugp1).

[**Supplementary Table 5.** Top 20 features of medication classification models.](#_heading=h.nmf14n)

[**Supplementary Table 6.** Top 20 features to classify diagnosis derived from LIME.](#_heading=h.1mrcu09)

**Supplementary Figure 1**. Leave-one-site-out cross-validation.

**Author information**

## Supplementary Table 1. Demographic and clinical characteristics of each site.

| **Site** | **OCD/HC (N)** | **Age** | **Male** | **Medicated N (%)** | **Childhood-onset N (%)** | **Duration of illness** | **YBOCS score** | **Lifetime anxiety N (%)** | **Lifetime depression N (%)** |
| --- | --- | --- | --- | --- | --- | --- | --- | --- | --- |
| **(a) Adult** | | | | | | | | | |
| **Amsterdam** | 38/34 | 39.2±10.5 | 16 (42.1) | 0 | 24 (66.7) | 23.7 ± 12.8 | 21.3 ± 6.1 | 16 (42.1) | 18 (47.4) |
| **Bangalore** | 158/131 | 28.1±6.2 | 90 (57) | 63 (40) | 47 (29.7) | 7.2 ± 5.2 | 25.5 ± 6.5 | 14 (8.7) | 21 (13.3) |
| **Capetown** | 22/26 | 30±10.2 | 11 (47.8) | 9 (39.1) | 17 (73.9) | 17.2 ± 11.5 | 23 ± 4.2 | 0 (0) | 0 |
| **Kyoto** | 35/41 | 31.3±8.7 | 14 (40) | 0 | 10 (28.6) | 7.7 ± 6.2 | 21.9 ± 6.6 | 3 (8.6) | 0 |
| **Milan** | 63/65 | 34.3±11.4 | 44 (69.8) | 38 (60.3) | 41 (65.1) | 18.9 ± 11.6 | 31.4 ± 5.2 | 1 (1.6) | 5 (7.9) |
| **NYC** | 16/18 | 27.9±6.9 | 5 (31.3) | 13 (81.3) | 13 (81.3) | 15.1 ± 6.7 | 19.9 ± 5.9 | 8 (50) | 3 (18.8) |
| **Munich** | 73/60 | 31.1±9.6 | 47 (64.4) | 44 (60.3) | 41 (56.9) | 13.5 ± 10.3 | 20.8 ± 6.2 | 0 (0) | 0 |
| **Rome** | 77/111 | 36.5±11 | 50 (65.8) | 68 (89.5) | 42 (56.8) | 17.3 ± 12.8 | 23.2 ± 9.3 | 8 (10.5) | 7 (9.2) |
| **Sao Paulo** | 37/29 | 36.3±11.7 | 16 (43.2) | 13 (35.1) | 31 (88.6) | 26.3 ± 13.5 | 29.2 ± 6.2 | 25 (67.6) | 28 (75.7) |
| **Seoul** | 92/86 | 26±6.5 | 60 (65.2) | 13 (14.1) | 41 (46.1) | 6.2 ± 7 | 25.8 ± 6.9 | 1 (1.1) | 2 (2.17) |
| **Shanghai** | 79/45 | 29.2±9.2 | 44 (55.7) | 0 | 21 (26.9) | 6 ± 5.9 | 26.2 ± 4.7 | 0 (0) | 0 |
|  | | | | | | | | | |
| **Bangalore** | 13/12 | 13.7±2.0 | 6 (23.0) | 11 (42.3) |  | 1.46±1.0 | 21±7.6 | 3 (23.1) | 1 (7.7) |
| **Barcelona** | 52/27 | 14.9±1.8 | 30 (28.9) | 41 (39.4) |  | 2.64±2.2 | 18.7±7.6 | 15 (28.9) | 3 (5.8) |
| **British Columbia** | 13/16 | 13.3±3.2 | 3 (11.5) | 11 (42.3) |  | 3.12±2.7 | 13.4±6.4 | 15 (38.5) | 0 |
| **Calgary** | 19/18 | 12.2±2.4 | 10 (26.3) | 0 |  |  | 23.1±4.7 | NA | 0 |
| **Chiba** | 20/6 | 14.3±2.0 | 13 (32.5) | 8 (20) |  | 2.1±1.8 | 26.9±6.2 | 2 (10) | 0 |
| **Oxford** | 21/23 | 16.3±1.3 | 11 (26.2) | 14 (33.3) |  | 4.46±3.2 | 19.6±7.4 | 7 (33.3) | 5 (23.8) |
| **Yale** | 23/22 | 14.3±2.2 | 13 (26.3) | 12 (28.6) |  |  | 26.9±4.5 | 10 (43.5) | 9 (39.1) |
| **Zurich** | 14/18 | 15.2±1.5 | 11 (27.7) | 8 (30.0) |  | 4.74±2.3 | 16.1±10.2 | 6 (42.9) | 0 |
| *YBOCS* Yale-Brown Obsessive–Compulsive Scale, *NA* not available. | | | | | | | | | |

##

## Supplementary Table 2. Demographic and clinical characteristics of discovery and replication sets. (A), Adult sample to classify OCD vs. HC. (B), Adult sample to classify unmedicated OCD vs. HC. (C), Adult sample to classify medicated OCD vs. unmedicated OCD. (D) Pediatric sample to classify OCD vs. HC. (E), Pediatric sample to classify unmedicated OCD vs. HC. (F), Pediatric sample to classify medicated OCD vs. unmedicated OCD.

## Adult sample to classify OCD vs. HC.

| **Characteristics** | **Train sample for diagnosis in adults** | | **Test sample for diagnosis in adults** | |
| --- | --- | --- | --- | --- |
| **OCD sample** | **HC sample** | **OCD sample** | **HC sample** |
| **(n = 552)** | **(n = 516)** | **(n = 138)** | **(n = 130)** |
| Age (years) | 31.6± 9.78 | 30.8± 9.97 | 30.9±9.71 | 32.1±10.5 |
| OCD illness severity score | 24.9± 7.14 |  | 25.5±7.02 |  |
| Duration of illness | 12.5± 11.1 |  | 11.8±10.7 |  |
|  | N (%) | N (%) | N (%) | N (%) |
| Male | 314 (58.5) | 302 (56.9) | 83 (60.14) | 78 (60) |
| Medication use at time of scan | 207 (61.8) |  | 54 (39.13) |  |
| Childhood-onset | 258 (47.3) |  | 70 (52.2) |  |
| Lifetime diagnosis |  |  |  |  |
| Anxiety | 61 (73.6) |  | 15(10.87) |  |
| Major depression | 70 (12.7) |  | 14 (10.14) |  |
| Current comorbid disorders |  |  |  |  |
| Anxiety | 55 (10.0) |  | 14 (10.14) |  |
| Major depression | 66 (12.0) |  | 11 (7.97) |  |
| OCD symptom dimension |  |  |  |  |
| Aggressive/checking | 328 (59.42) |  | 83 (60.14) |  |
| Contamination/cleaning | 281 (50.91) |  | 74 (53.62) |  |
| Symmetry/ordering | 299 (54.17) |  | 71 (51.45) |  |
| Sexual/religious | 181 (32.79) |  | 47 (34.06) |  |
| Hoarding | 92 (16.7) |  | 22 (15.94) |  |

## Adult sample to classify unmedicated OCD vs. HC.

| **Characteristics** | **Train sample for classification of unmedicated OCD from HC in adults** | | **Test sample for unmedicated OCD from HC in adults** | |
| --- | --- | --- | --- | --- |
| **unmedicated OCD sample** | **HC sample** | **unmedicated OCD sample** | **HC sample** |
| **(n = 338)** | **(n = 516)** | **(n = 85)** | **(n = 129)** |
| Age (years) | 31.4± 9.61 | 30.5± 9.8 | 29.5±8.26 | 32.1±10.5 |
| OCD illness severity score | 25± 6.39 |  | 25.2±6.5 |  |
| Duration of illness | 11.4± 11.0 |  | 8.6±8.9 |  |
|  | N (%) | N (%) | N (%) | N (%) |
| Male | 183 (54.14) | 303 (58.6) | 48 (56.5) | 77 (59.7) |
| Medication use at time of scan | 338 (100) |  | 85 (100) |  |
| Childhood-onset | 149 (44.5) |  | 32 (37.6) |  |
| Lifetime diagnosis |  |  |  |  |
| Anxiety | 36 (10.65) |  | 11 (12.94) |  |
| Major depression | 38 (11.24) |  | 9 (10.59) |  |
| Current comorbid disorders |  |  |  |  |
| Anxiety | 33 (9.8) |  | 10 (11.76) |  |
| Major depression | 21 (6.2) |  | 7 (8.24) |  |
| OCD symptom dimension |  |  |  |  |
| Aggressive/checking | 203 (60.06) |  | 43 (50.59) |  |
| Contamination/cleaning | 162 (47.93) |  | 39 (45.88) |  |
| Symmetry/ordering | 201 (59.47) |  | 50 (58.82) |  |
| Sexual/religious | 112 (33.14) |  | 13 (15.29) |  |
| Hoarding | 54 (15.98) |  | 20 (23.53) |  |

## Adult sample to classify medicated OCD vs. unmedicated OCD.

| **Characteristics** | **Train sample for classification of medicated OCD from unmedicated OCD in adults** | | **Test sample for medicated OCD from unmedicated OCD in adults** | |
| --- | --- | --- | --- | --- |
| **medicated OCD sample** | **unmedicated OCD sample** | **medicated OCD sample** | **unmedicated OCD**  **sample** |
| **(n = 209)** | **(n = 228)** | **(n = 52)** | **(n = 85)** |
| Age (years) | 32.4± 10 | 31± 9.31 | 32.9±10.3 | 30.7±9.68 |
| OCD illness severity score | 24.8± 8.2 | 25.1± 6.38 | 25.1±8.02 | 24.8±6.5 |
| Duration of illness | 15.2± 11.3 | 10.8± 10.4 | 13.8±10.8 | 10.8±11.7 |
|  | N (%) | N (%) | N (%) | N (%) |
| Male | 129 (61.72) | 184 (84.44) | 33 (63.46) | 47 (55.3) |
| Medication use at time of scan | 209 (100) |  | 85 (100) | 85 (100) |
| Childhood-onset | 266 (49.4) |  | 60 (44.1) |  |
| Lifetime diagnosis |  |  |  |  |
| Anxiety | 22 (10.53) | 35 (10.36) | 5 (9.62) | 12 (14.12) |
| Major depression | 25 (11.96) | 32 (9.47) | 11 (21.15) | 15 (17.65) |
| Current comorbid disorders |  |  |  |  |
| Anxiety | 20 (9.57) | 31 (9.17) | 5 (9.62) | 12 (14.12) |
| Major depression | 36 (17.22) | 19 (5.62) | 12 (23.08) | 9 (10.59) |
| OCD symptom dimension |  |  |  |  |
| Aggressive/checking | 128 (61.24) | 200 (59.17) | 33 (63.46) | 46 (54.12) |
| Contamination/cleaning | 119 (56.94) | 165 (48.82) | 32 (61.54) | 36 (42.35) |
| Symmetry/ordering | 86 (41.15) | 195 (57.69) | 30 (57.69) | 56 (65.88) |
| Sexual/religious | 82 (39.23) | 99 (29.29) | 18 (34.62) | 26 (30.59) |
| Hoarding | 29 (13.88) | 58 (17.16) | 9 (17.31) | 16 (18.82) |

## Pediatric sample to classify OCD vs. HC.

| **Characteristics** | **Train sample for diagnosis in pediatrics** | | **Test sample for diagnosis in pediatrics** | |
| --- | --- | --- | --- | --- |
|
| **OCD sample** | **HC sample** | **OCD sample** | **HC sample** |
| **(n = 113)** | **(n = 140)** | **(n = 35)** | **(n = 29)** |
| Age (years) | 14.5± 2.24 | 14.4± 2.48 | 14.6±2.35 | 14.2±2.34 |
| OCD illness severity score | 20.8± 8.03 |  | 21.0±8.12 |  |
| Duration of illness | 3.00± 2.53 |  | 2.98±2.29 |  |
|  | N (%) | N (%) | N (%) | N (%) |
| Male | 77 (55) | 20 (59.14) | 83 (60.14) | 78 (60) |
| Medication use at time of scan | 81 (57.86) |  | 24 (68.57) |  |
| Lifetime diagnosis |  |  |  |  |
| Anxiety | 38 (27.14) |  | 10 (28.57) |  |
| Major depression | 17 (76.43) |  | 1 (2.86) |  |
| Current comorbid disorders |  |  |  |  |
| Anxiety | 21 (15.0) |  | 8 (22.86) |  |
| Major depression | 21 (15.0) |  | 8 (22.86) |  |
| OCD symptom dimension |  |  |  |  |
| Aggressive/checking | 14 (10.0) |  | 1 (2.86) |  |
| Contamination/cleaning | 14 (10.0) |  | 2 (5.71) |  |
| Symmetry/ordering | 7 (5.0) |  | 0 (0) |  |
| Sexual/religious | 0 (0) |  | 0 (0) |  |
| Hoarding | 5 (3.57) |  | 1 (2.86) |  |

## Pediatric sample to classify unmedicated OCD vs. HC.

| **Characteristics** | **Train sample for classification of unmedicated OCD from HC in pediatrics** | | **Test sample for unmedicated OCD from HC in pediatrics** | |
| --- | --- | --- | --- | --- |
| **unmedicated OCD sample** | **HC sample** | **unmedicated OCD sample** | **HC sample** |
| **(n = 56)** | **(n = 95)** | **(n = 14)** | **(n = 24)** |
| Age (years) | 13.3± 2.31 | 13,9± 2.36 | 14.5±2.32 | 14.1±2.77 |
| OCD illness severity score | 20.8± 8.10 |  | 17.7±8.91 |  |
| Duration of illness | 2.82± 2.47 |  | 2.9±2.44 |  |
|  | N (%) | N (%) | N (%) | N (%) |
| Male | 33 (58.93) | 52 (54.74) | 6 (42.86) | 13 (54.17) |
| Medication use at time of scan | 0 (0.0) |  | 0 (0.0) |  |
| Lifetime diagnosis |  |  |  |  |
| Anxiety | 10 (17.86) |  | 2 (14.29) |  |
| Major depression | 2 (3.57) |  | 2 (14.29) |  |
| Current comorbid disorders |  |  |  |  |
| Anxiety | 3 (5.36) |  | 1 (7.14) |  |
| Major depression | 0 (0.0) |  | 0 (0.0) |  |
| OCD symptom dimension |  |  |  |  |
| Aggressive/checking | 7 (12.5) |  | 2 (21.43) |  |
| Contamination/cleaning | 8 (14.29) |  | 1 (7.14) |  |
| Symmetry/ordering | 3 (5.36) |  | 0 (0.0) |  |
| Sexual/religious | 0 (0.0) |  | 0 (0.0) |  |
| Hoarding | 0 (0.0) |  | 0 (0.0) |  |

1. **Pediatric sample to classify medicated OCD vs. unmedicated OCD.**

| **Characteristics** | **Train sample for classification of medicated OCD from unmedicated OCD in pediatrics** | | **Test sample for medicated OCD from unmedicated OCD in pediatrics** | |
| --- | --- | --- | --- | --- |
| **medicated OCD sample** | **unmedicated OCD sample** | **medicated OCD sample** | **unmedicated OCD sample** |
| **(n = 84)** | **(n = 56)** | **(n = 21)** | **(n = 14)** |
| Age (years) | 15.2± 1.9 | 13.4± 2.4 | 14.5±2.24 | 14.1±2.13 |
| OCD illness severity score | 21.8± 8.10 | 19.7± 8.66 | 18.9±6.42 | 22.2±6.56 |
| Duration of illness | 2.96± 8.10 | 2.65± 1.90 | 18.9±6.42 | 3.89±4.54 |
|  | N (%) | N (%) | N (%) | N (%) |
| Male | 47 (55.95) | 29 (51.79) | 11 (52.38) | 10 (71.43) |
| Medication use at time of scan | 84 (100) |  | 21 (100) |  |
| Lifetime diagnosis |  |  |  |  |
| Anxiety | 56 (55.36) | 31 (55.36) | 8 (38.1) | 1 (7.14) |
| Major depression | 11 (13.10) | 4 (7.14) | 3 (14.29) | 0 (0.0) |
| Current comorbid disorders |  |  |  |  |
| Anxiety | 19 (22.62) | 4 (7.14) | 6 (28.57) | 0 (0.0) |
| Major depression | 5 (70.24) | 0 (0.0) | 1 (4.76) | 0 (0.0) |
| OCD symptom dimension |  |  |  |  |
| Aggressive/checking | 5 (5.95) | 6 (10.71) | 1 (4.76) | 3 (21.43) |
| Contamination/cleaning | 6 (45.24) | 7 (12.5) | 1 (4.76) | 2 (14.29) |
| Symmetry/ordering | 4 (40.48) | 2 (35.71) | 0 (0.0) | 1 (7.14) |
| Sexual/religious | 0 (0.0) | 0 (0.0) | 0 (0.0) | 0 (0.0) |
| Hoarding | 1 (1.19) | 3 (5.36) | 1 (4.76) | 1 (7.14) |

## Supplementary Table 3. Performance of OCD classification applied NeuroComBat harmonization with covariates (age, sex). (95% confidence interval) (A) Adult sample applied NeuroComBat with covariates (age, sex), (B) Pediatric sample applied NeuroComBat with covariates (age, sex).

## Adult sample applied NeuroComBat with covariates (age, sex)

|  | **OCD (N = 690)  vs. HC (N = 646)** | | **unmedicated OCD (N = 429) vs. HC (N = 646)** | | **unmedicated OCD (N = 429)  vs. medicated OCD (N = 261)** | |
| --- | --- | --- | --- | --- | --- | --- |
| **Discovery set** | **Replication set** | **Discovery set** | **Replication set** | **Discovery set** | **Replication set** |
| ROC-AUC | 61.61 ± 6.53 | 68.27 ± 3.74 | 67.2 ± 5.82 | 51.35 ± 4.11 | 64.36 ± 9.31 | 61.76 ± 5.02 |
| Accuracy (%) | 63.1 ± 4.69 | 69.63 ± 3.10 | 68.9 ± 6.28 | 55.6 ± 3.83 | 63.26 ± 10.02 | 63.5 ± 5.20 |
| Sensitivity (%) | 64.4 ± 14.44 | 51.8 ± 19.80 | 76.21 ± 8.46 | 56.47 ± 11.39 | 55.44 ± 19.11 | 50 ± 21.58 |
| Specificity (%) | 61.67 ± 17.46 | 81.4 ± 3.98 | 62.82 ± 16.88 | 55.04 ± 14.62 | 82.44 ± 7.68 | 71.8 ± 11.99 |
| For the classification of medication status among OCD patients, some sites (i.e., Amsterdam, Shanghai) containing only unmedicated OCD were excluded from the discovery set. | | | | | | |

**(B) Pediatric sample, NeuroComBat with covariates (age, sex)**

|  | **OCD (N = 175)  vs. HC (N = 142)** | | **unmedicated OCD (N = 70)  vs. HC (N = 142)** | | **unmedicated OCD (N = 105)  vs. medicated OCD (N = 70)** | |
| --- | --- | --- | --- | --- | --- | --- |
| **Discovery set** | **Replication set** | **Discovery set** | **Replication set** | **Discovery set** | **Replication set** |
| ROC-AUC | 53.85 ± 11.71 | 63.74 ± 7.12 | 58.02 ± 13.41 | 44.05 ± 10.79 | 63.24 ± 0.34 | 54.76 ± 10.28 |
| Accuracy (%) | 60.15 ± 9.87 | 64.06 ± 6.40 | 58.32 ± 12.80 | 68.42 ± 4.02 | 65.65 ± 0.36 | 60 ± 8.72 |
| Sensitivity (%) | 51.7 ± 22.96 | 65.7 ± 14.60 | 76.83 ± 11.82 | 14.29 ± 43.73 | 70.2 ± 1.69 | 52.38 ± 19.45 |
| Specificity (%) | 69.06 ± 14.87 | 62.07 ± 17.62 | 59.22 ± 2.26 | 100 | 68.96 ± 2.15 | 71.43 ± 14.58 |
| For the classification of medication status among OCD patients, some sites (i.e., Calgary) containing only unmedicated OCD were excluded from the discovery set. | | | | | | |

##

**Supplementary Table 4. Top 10 features of diagnosis classification models.** (A) Classification of OCD from HC in adult samples (OCD: N = 690, HC: N = 646). (B) Classification of OCD from HC in pediatric samples (OCD: N = 175, HC: N = 142). (C) Classification of unmedicated OCD from HC in adult samples (unmedicated OCD: N = 429, HC: N = 646). (D) Classification of unmedicated OCD from HC in pediatric samples (unmedicated OCD: N = 70, HC: N = 142)

## To further investigate the effect of diagnosis and medication effect, we applied a machine learning interpretation method, K-LIME (K-Local Interpretable Model-agnostic Explanation), to the classification models. These interpretation models accounted for the variance of the best machine learning models ranging from 45.69% to 63.8% (Supplementary Table 4, 5)

1. **Classification of OCD from HC in adult samples** (OCD: N = 690, HC: N = 646)

| **Rank** | **Feature** | **DTI Metric** | **Weight** |
| --- | --- | --- | --- |
| 1 | Right Superior corona radiata | MD | 1.000 |
| 2 | Age | . | 0.997 |
| 3 | Left Posterior thalamic radiation | FA | 0.978 |
| 4 | Genu of corpus callosum | MD | 0.900 |
| 5 | Bilateral Posterior thalamic radiation | FA | 0.863 |
| 6 | Left Sagittal stratum | FA | 0.716 |
| 7 | Bilateral Posterior limb of internal capsule | FA | 0.703 |
| 8 | Bilateral Superior longitudinal fasciculus | FA | 0.670 |
| 9 | Left Posterior limb of internal capsule | AD | 0.660 |
| 10 | Bilateral Superior longitudinal fasciculus | MD | 0.617 |

**(B) Classification of OCD from HC in pediatric samples** (OCD: N = 175, HC: N = 142)

| **Rank** | **Feature** | **DTI Metric** | **Weight** |
| --- | --- | --- | --- |
| 1 | Left Cingulum (hippocampus) | MD | 1.000 |
| 2 | Bilateral Uncinate fasciculus | MD | 0.886 |
| 3 | Right Fornix and Stria terminalis | FA | 0.833 |
| 4 | Right External capsule | AD | 0.829 |
| 5 | Bilateral Cingulum (hippocampus) | AD | 0.815 |
| 6 | Right Corticospinal tract | FA | 0.788 |
| 7 | Left Anterior corona radiata | AD | 0.778 |
| 8 | Left Corticospinal tract | FA | 0.730 |
| 9 | Bilateral Fornix and Stria terminalis | FA | 0.715 |
| 10 | Right Retrolenticular part of internal capsule | MD | 0.707 |

**(C) Classification of unmedicated OCD from HC in adult sample** (unmedicated OCD: N = 429, HC: N = 646)

| **Rank** | **Feature** | **DTI Metric** | **Weight** |
| --- | --- | --- | --- |
| 1 | Age | . | 1.000 |
| 2 | Bilateral Fornix and Stria terminalis | RD | 0.908 |
| 3 | Genu of corpus callosum | RD | 0.880 |
| 4 | Right Posterior limb of internal capsule | FA | 0.748 |
| 5 | Right Inferior fronto-occipital fasciculus | AD | 0.739 |
| 6 | Bilateral Posterior limb of internal capsule | FA | 0.696 |
| 7 | Corpus Callosum | AD | 0.660 |
| 8 | Left Posterior limb of internal capsule | AD | 0.642 |
| 9 | Left Posterior limb of internal capsule | FA | 0.638 |
| 10 | Right Uncinate fasciculus | AD | 0.459 |

**(D) Classification of unmedicated OCD from HC in pediatric samples** (unmedicated OCD: N = 70, HC: N = 142)

| **Rank** | **Feature** | **DTI Metric** | **Weight** |
| --- | --- | --- | --- |
| 1 | Splenium of corpus callosum | FA | 1.000 |
| 2 | Bilateral Retrolenticular part of internal capsule | FA | 0.826 |
| 3 | Left Inferior fronto-occipital fasciculus | AD | 0.766 |
| 4 | Right Sagittal stratum | FA | 0.756 |
| 5 | Left Anterior limb of internal capsule | AD | 0.750 |
| 6 | Bilateral Sagittal stratum | FA | 0.729 |
| 7 | Left Uncinate fasciculus | FA | 0.727 |
| 8 | Bilateral Superior fronto-occipital fasciculus | FA | 0.718 |
| 9 | Left Posterior limb of internal capsule | FA | 0.715 |
| 10 | Left Superior fronto-occipital fasciculus | FA | 0.703 |

##

## Supplementary Table 5. Top 20 features of medication classification models. (A) Classification model of medicated OCD from unmedicated OCD in adult samples (medicated OCD: N = 261, unmedicated OCD: N = 429). (B) Classification model of medicated OCD from unmedicated OCD in pediatric samples (medicated OCD: N = 70, unmedicated OCD: N = 105)

**(A) Classification model of medicated OCD from unmedicated OCD in adult samples** (medicated OCD: N = 261, unmedicated OCD: N = 429)

| **Rank** | **Feature** | **DTI Metric** | **Weight** |
| --- | --- | --- | --- |
| 1 | Corpus Callosum | AD | 1.000 |
| 2 | Left Posterior limb of internal capsule | FA | 0.726 |
| 3 | Average FA | FA | 0.476 |
| 4 | Right Inferior fronto-occipital fasciculus | AD | 0.308 |
| 5 | Bilateral Fornix and Stria terminalis | MD | 0.308 |
| 6 | Bilateral Cingulum (hippocampus) | RD | 0.267 |
| 7 | Genu of corpus callosum | FA | 0.261 |
| 8 | Average RD | RD | 0.253 |
| 9 | Genu of corpus callosum | AD | 0.228 |
| 10 | Right Cingulum (hippocampus) | RD | 0.222 |

**(B) Classification of medicated OCD from unmedicated OCD in pediatric samples** (medicated OCD: N = 70, unmedicated OCD: N = 105)

| **Rank** | **Feature** | **DTI Metric** | **Weight** |
| --- | --- | --- | --- |
| 1 | Bilateral Fornix (cres)/Stria terminalis | AD | 1.000 |
| 2 | Left Anterior corona radiata | RD | 0.971 |
| 3 | Bilateral Cingulum (cingulate gyrus) | AD | 0.854 |
| 4 | Bilateral Uncinate fasciculus | AD | 0.833 |
| 5 | Right Cingulum (cingulate gyrus) | AD | 0.800 |
| 6 | Bilateral Cingulum (hippocampus) | AD | 0.791 |
| 7 | Left Internal capsule | AD | 0.790 |
| 8 | Bilateral Posterior limb of internal capsule | FA | 0.722 |
| 9 | Right Anterior limb of internal capsule | FA | 0.692 |
| 10 | Left Anterior limb of internal capsule | AD | 0.685 |

##

## Supplementary Table 6. Top 20 features to classify diagnosis derived from LIME. (A) Classification of OCD from HC in adult samples (OCD: N = 690, HC: N = 646), (B) Classification of OCD from HC in pediatric samples (OCD: N = 175, HC: N = 142), (C) Classification of unmedicated OCD (N = 429) and HC (N = 646) in adult samples.

## (A) Classification of OCD from HC in adult samples (OCD: N = 690, HC: N = 646)

|  | **Features positively associated  with adult OCD** | | | **Features negatively associated  with adult OCD** | | |
| --- | --- | --- | --- | --- | --- | --- |
| **Rank** | **Feature** | **DTI**  **Index** | **Weight** | **Feature** | **DTI**  **Index** | **Weight** |
| 1 | Bilateral Corticospinal tracts | RD | 0.091 | Corpus callosum | AD | 0.039 |
| 2 | Bilateral Posterior limb of internal capsule | FA | 0.069 | Corpus callosum | MD | 0.036 |
| 3 | Corpus callosum | FA | 0.050 | Bilateral Superior corona radiata | FA | 0.036 |
| 4 | Bilateral Internal capsule | FA | 0.045 | Right Fornix/Stria terminalis | RD | 0.035 |
| 5 | Bilateral Corona radiata | FA | 0.044 | Right Corona radiata | AD | 0.035 |
| 6 | Bilateral Fornix/Stria terminalis | MD | 0.038 | Bilateral Internal capsule | AD | 0.033 |
| 7 | Right Posterior limb of internal capsule | AD | 0.035 | Bilateral Uncinate fasciculus | RD | 0.033 |
| 8 | Bilateral Internal capsule | RD | 0.033 | Bilateral Fornix/Stria terminalis | AD | 0.032 |
| 9 | Bilateral Anterior corona radiata | RD | 0.030 | Bilateral Superior corona radiata | FA | 0.032 |
| 10 | Bilateral Superior corona radiata | AD | 0.029 | Bilateral Anterior corona radiata | AD | 0.031 |
| The interpretation model accounts for 45.69% of the variance | | | | | | |

**(B) Classification of OCD from HC in pediatric samples**  (OCD: N = 175, HC: N = 142)

|  | **Features positively associated  with pediatric OCD** | | | **Features negatively associated  with pediatric OCD** | | |
| --- | --- | --- | --- | --- | --- | --- |
| **Rank** | **Feature** | **DTI**  **Index** | **Weight** | **Feature** | **DTI**  **Index** | **Weight** |
| 1 | Left Posterior thalamic radiation | RD | 0.350 | Left Posterior thalamic radiation | AD | 0.370 |
| 2 | Right Retrolenticular part of the internal capsule | MD | 0.330 | Right External capsule | AD | 0.310 |
| 3 | Left Fornix/Stria terminalis | AD | 0.330 | Bilateral Superior corona radiata | FA | 0.280 |
| 4 | Right Posterior thalamic radiation | AD | 0.310 | Left Cingulum cingulate gyrus part | RD | 0.270 |
| 5 | Left Uncinate fasciculus | RD | 0.30 | Right Anterior limb of internal capsule | RD | 0.260 |
| 6 | Bilateral Inferior fronto-occipital fasciculus | RD | 0.280 | Left Anterior corona radiata | RD | 0.250 |
| 7 | Right External capsule | MD | 0.270 | Bilateral Inferior fronto-occipital fasciculus | FA | 0.250 |
| 8 | Right External capsule | RD | 0.260 | Right Posterior thalamic radiation | RD | 0.250 |
| 9 | Right Cingulum cingulate gyrus part | RD | 0.260 | Left Sagittal stratum | MD | 0.240 |
| 10 | Corpus callosum | FA | 0.260 | Left Retro Lenticular part of internal capsule | MD | 0.240 |
| The interpretation model accounts for 47.12% of the variance. | | | | | | |

## (C) Classification of unmedicated OCD (N = 429) and HC (N = 646) in adult samples

|  | **Features positively associated  with unmedicated OCD** | | | **Features negatively associated  with unmedicated OCD** | | |
| --- | --- | --- | --- | --- | --- | --- |
| **Rank** | **Feature** | **DTI**  **Index** | **Weight** | **Feature** | **DTI**  **Index** | **Weight** |
| 1 | Bilateral Posterior limb of internal capsule | FA | 0.200 | Bilateral Cingulum cingulate gyrus part | MD | 0.130 |
| 2 | Bilateral Cingulum hippocampal part | MD | 0.170 | Right Cingulum hippocampal part | RD | 0.130 |
| 3 | Bilateral Posterior limb of internal capsule | MD | 0.120 | Left Posterior thalamic radiation | RD | 0.088 |
| 4 | Left Posterior thalamic radiation | MD | 0.100 | Right Fornix/Stria terminalis | RD | 0.083 |
| 5 | Bilateral Corona radiata | FA | 0.093 | Bilateral Cingulum hippocampal part | AD | 0.080 |
| 6 | Bilateral Posterior limb of internal capsule | RD | 0.090 | Bilateral Posterior corona radiata | MD | 0.075 |
| 7 | Bilateral Corona radiata | AD | 0.085 | Bilateral Anterior corona radiata | AD | 0.071 |
| 8 | Right Posterior limb of internal capsule | RD | 0.080 | Bilateral Fornix/Stria terminalis | MD | 0.068 |
| 9 | Right Cingulum cingulate gyrus part | MD | 0.072 | Bilateral Superior corona radiata | FA | 0.064 |
| 10 | Right Cingulum hippocampal part | MD | 0.070 | Corpus callosum | MD | 0.056 |
| Note that the target class is unmedicated OCD.  The interpretation model accounts for 63.8% of the variance. | | | | | | |

## Supplementary Table 7. Top 20 features to differentiate between adult unmedicated OCD (N = 429) and adult medicated OCD (N = 261) derived from LIME.

|  | **Features positively associated  with OCD medication** | | | **Features negatively associated  with OCD medication** | | |
| --- | --- | --- | --- | --- | --- | --- |
| **Rank** | **Feature** | **DTI**  **Index** | **Weight** | **Feature** | **DTI**  **Index** | **Weight** |
| 1 | Bilateral Posterior corona radiata | RD | 0.005 | Corpus callosum | AD | 0.008 |
| 2 | Bilateral Posterior limb of internal capsule | RD | 0.004 | Average RD | | 0.007 |
| 3 | Bilateral Superior corona radiata | RD | 0.007 | Left Posterior limb of internal capsule | FA | 0.005 |
| 4 | Right Inferior fronto-occipital fasciculus | AD | 0.002 | Corpus callosum | MD | 0.004 |
| 5 | Right Posterior corona radiata | MD | 0.002 | Bilateral Anterior corona radiata | MD | 0.003 |
| 6 | Splenium of corpus callosum | MD | 0.002 | Right Anterior limb of internal capsule | MD | 0.003 |
| 7 | Splenium of corpus callosum | AD | 0.002 | Right Internal capsule | RD | 0.003 |
| 8 | Bilateral Superior corona radiata | AD | 0.002 | Bilateral Superior corona radiata | FA | 0.002 |
| 9 | Splenium of corpus callosum | RD | 0.002 | Bilateral Corticospinal tract | RD | 0.002 |
| 10 | Left Posterior thalamic radiation | MD | 0.002 | Right Fornix/Stria terminalis | FA | 0.002 |
| Note that the target class is medicated OCD.  The interpretation model accounts for 59.8% of the variance. | | | | | | |

##

## Supplementary Table 8. Performance of adult-trained models in pediatric OCD prediction – mean with 95% confidence interval.

|  | **OCD vs. HC** | |
| --- | --- | --- |
| **Trained, validated  on adult samples** | **Tested  on pediatric samples** |
| ROC-AUC | 63.91 (52.4-72.3) | 55.81 (49.5-62.2) |
| Accuracy (%) | 64.81 (57.1-75.0) | 57.41 (51.7-63.4) |
| Sensitivity (%) | 65.2 (33.2-91.4) | 52.57 (19.4-80) |
| Specificity (%) | 64.47 (35.8-91.6) | 63.38 (34.5-92.3) |

As a secondary analysis, we assessed differences in matter microstructure between adult OCD and pediatric OCD participants. We tested the generalizability of the model trained on the adult samples (N=1,336; OCD: 690, HC: 640) to the pediatric samples (N=317; OCD: 175, HC: 142). The model trained on adult samples showed moderately accurate performance in classifying adult OCD participants from HCs (ROC-AUC = 63.91, 95% CI = 52.4-72.3). This model provided lower performance when applied to pediatric samples (ROC-AUC =55.81, 95% CI =49.5-62.2)**.**

| **Rank** | **Feature** | **DTI** | **Weight** |
| --- | --- | --- | --- |
| **Index** |
| 1 | R Inferior fronto-occipital fasciculus | FA | 1.000 |
| 2 | L Posterior thalamic radiation | FA | 0.872 |
| 3 | L Posterior limb of internal capsule | AD | 0.826 |
| 4 | L Posterior corona radiata | FA | 0.750 |
| 5 | L Uncinate fasciculus | FA | 0.377 |
| 6 | R Superior longitudinal fasciculus | RD | 0.316 |

## Supplementary Figure 1. Leave-one-site-out cross-validation.

##
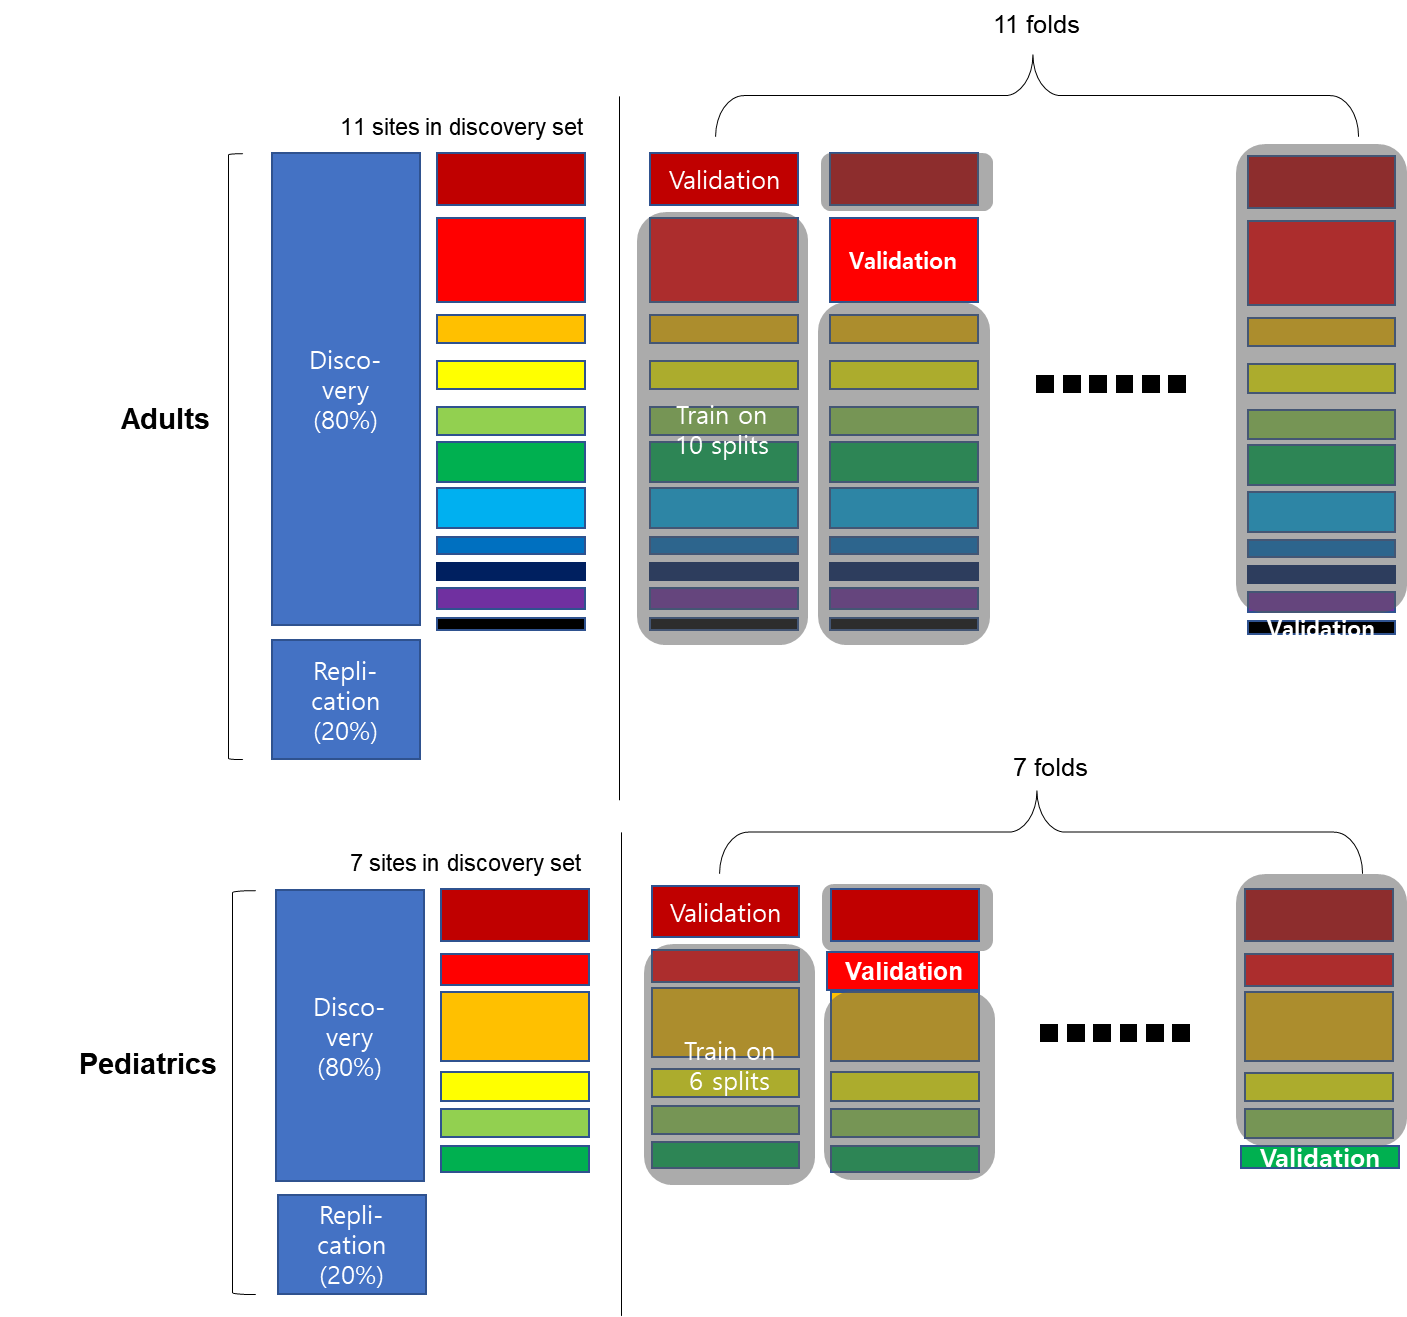


##

## Supplementary Figure 4. Feature importance plot of the diagnosis and medication models in adult (Left) and pediatric (Right) samples. (A), relative importance plot of OCD vs. HC model. (B), the relative importance of unmedicated OCD vs. HC model. (C), relative importance plot of medicated OCD vs. unmedicated OCD model. The top 10 features are represented.


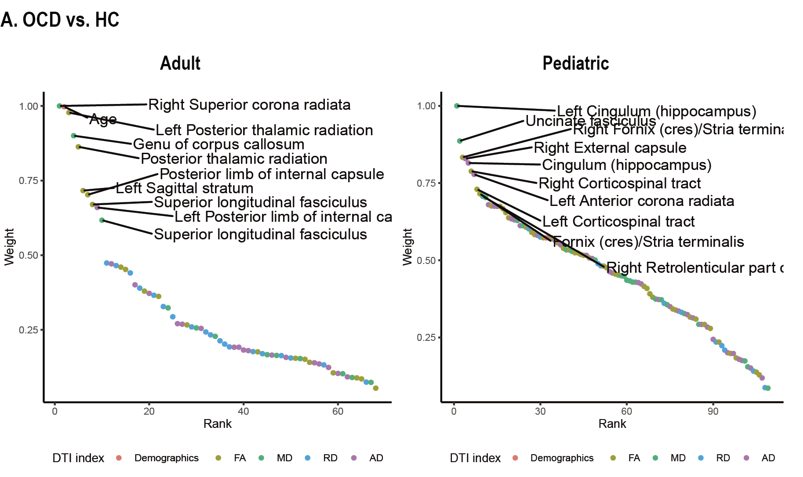


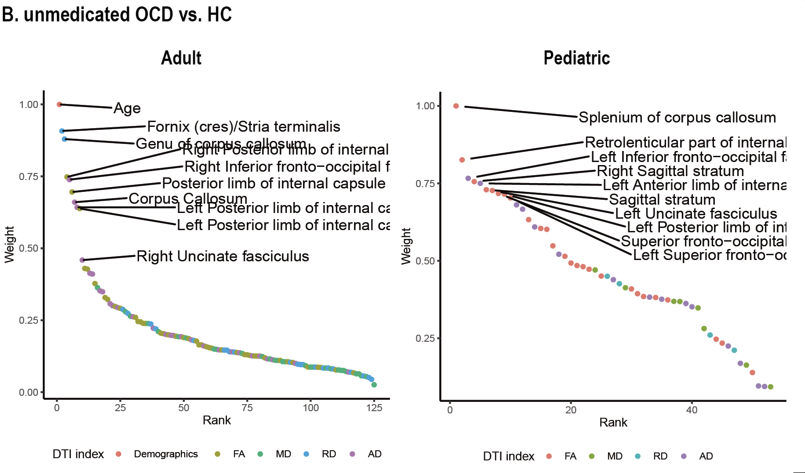


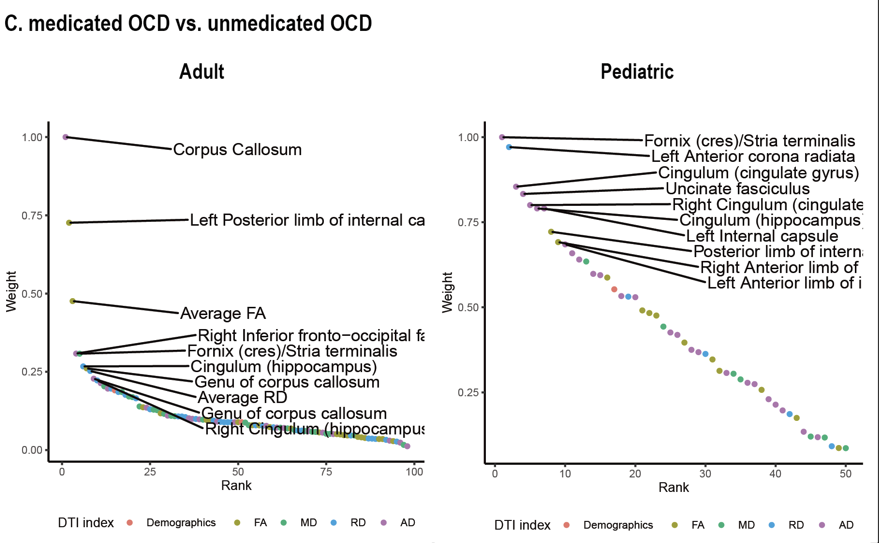


Author Information

## ENIGMA-OCD Working Group Consortium

Yoshinari Abe 1, Pino Alonso 2, 3, 4, Stephanie Ameis 5, 6, 7, Alan Anticevic 8, Honami Arai 9, Kentaro Araki 9, Paul D. Arnold 10, 11, Justin T. Baker 12,13, Srinivas Balachander 14, Nerisa Banaj 15, Núria Bargalló 16, 17, 18, Marcelo C. Batistuzzo 19, 20, Francesco Benedetti 21, 22, Sara Bertolín 23. 24, John R. Best 25, 26, Jan-Carl Beucke 27, 28, 29, Premika S.W. Boedhoe 30, Irene Bollettini 22, Sven Bölte 31, Vilde Brecke 32, Silvia Brem 33, 34, Brian P. Brennan 12, 13, Willem B. Bruin 30, 35, Jan K. Buitelaar 36, 37, Rosa Calvo 24, 38, 39, 40, Carolina Cappi 41, Wei Chen 42, Yuqi Cheng 43, Ritu Bhusal Chhatkuli 9, 44, Sutoh Chihiro 45, Kang Ik Kevin Cho 46, 47, Sunah Choi 47, Valentina Ciullo 15, Ana Coelho 48, 49, 50, Daniel Costa 41, Beatriz Couto 48, 49, 50, Nan Dai 43, Sara Dallaspezia 51, Shareefa Dalvie 52, Damiaan Denys 53, Juliana B. Diniz 41, Benjamin A. Ely 54, Calesella Federico 21, Sónia Ferreira 48, 49, 50, Jamie D. Feusner 55, Kate D. Fitzgerald 56, Martine Fontaine 57, Jean-Paul Fouche 58, Egill Axfjord Fridgeirsson 53, Rachael Grazioplene 59, Edna Grünblatt 33, 34, Patricia Gruner 59, Kristen Hagen 32, 60, Sayo Hamatani 9, 44, Greg Hanna 56, Bjarne Hansen 32, 61, Mengxin He 43, Odile A. van den Heuvel 30, Yoshiyuki Hirano 9, 44, Marcelo Q. Höxter 19, 41, Morgan Hough 62, Hao Hu 63, Chaim Huyser 64, 65, Keisuke Ikari 66, Toshikazu Ikuta 67, Jonathan Ipser 68, Neda Jahanshad 69, 70, Anthony James 71, Fern Jaspers-Fayer 72, 73, Hongyan Jiang 43, Linling Jiang 43, Niels T. de Joode 30, Selina Kasprzak 30, 74, Norbert Kathmann 27, Christian Kaufmann 27, Minah Kim 75, 76, Taekwan Kim 46, 77, Hitomi Kitagawa 9, Kathrin Koch 78, 79, Masaru Kuno 9, Gerd Kvale 32, 80, Yoo Bin Kwak 81, Jun Soo Kwon 76, 82, 83, Luisa Lazaro 84, 85, 86, Junhee Lee 75, 87, Wieke van Leeuwen 53, Chiang-shan Ray Li 8, Na Li 43, Yanni Liu 56, Fang liu 43, Christine Lochner 88, Antonio Carlos Lopes 41, Jin Lu 43, Yuri Milaneschi 89, Daniela Rodriguez Manrique 78, 79, 90, Hein van Marle 91, Rachel Marsh 57, Ignacio Martínez-Zalacaín 2, 4, Sergi Mas 92, 93, 94, Sergi Mas 92, 93, 94, Yoshitada Masuda 95, David Mataix-Cols 96, Maria Alice de Mathis 41, Koji Matsumoto 95, Maria Paula Mazieiro 98, 99, Sarah Medland 99, Renata Melo 41, Jose M Menchón 2, 3, 4, Euripedes C. Miguel 41, Luciano Minuzzi 100, 101, Pedro Silva Moreira 48, 49, 102, Astrid Morer 93, 103, 104, Pedro Morgado 48, 49, 50, Alessandro S. De Nadai 105, Tomohiro Nakao 66, Janardhanan C. Narayanaswamy 14, Jin Narumoto 106, Masato Nihei 9, Luke Norman 107, Erika L. Nurmi 108, Joseph O’Neil 108, Sanghoon Oh 76, 109, Sho Okawa 45, Ana E. Ortiz 39, 84, Junko Ota 9, 44, Jose C. Pariente 17, Chris Perriello 110, John C. Piacentini 108, Maria Picó-Pérez 48, 111, Federica Piras 15, Fabrizio Piras 15, Christopher Pittenger 59, 112, 113, 114, Sara Poletti 22, Eva Real 23, 24, Y.C.Janardhan Reddy 14, Natalia Rodriguez 92, Daan van Rooij 115, Yuki Sakai 116, 117, João R. Sato 118, 119, Cinto Segalas 3, 4, 23, Roseli G. Shavitt 41, Zonglin Shen 43, Eiji Shimizu 9, 44, 120, Venkataram Shivakumar 121, Renata Silva 19, H. Blair Simpson 57, Noam Soreni 122, 123, Carles Soriano-Mas 3, 23, 124, Nuno Sousa 47, 48, 49, Mafalda Machado Sousa 48, 49, 50, Gianfranco Spalletta 15, 125, Dan J. Stein 126, 127, Emily R. Stern 128, 129, Michael Stevens 130, 131, S. Evelyn Stewart 25, 132, 133, Anouk van der Straten 53, Philip R. Szeszko 134, 135, Jumpei Takahashi 9, Tais Tanamatis 41, Jinsong Tang 136, Rajat Thomas 53, Sophia I. Thomopoulos 69, Paul M. Thompson 137, Anders Lillevik Thorsen 32, 61, David Tolin 130, 131, Anne Uhlmann 138, Benedetta Vai 22, Ysbrand D. van der Werf 139, Daniela Vecchio 15, Dick J. Veltman 30, Ganesan Venkatasubramanian 14, Chris Vriend 30, 74, Susanne Walitza 33, 34, Zhen Wang 140, Jicai Wang 43, Anri Watanabe 117, Cees J. Weeland 30, Guido A van Wingen 30, 35, Stella J. de Wit 30, Nicole Wolff 141, Lidewij Wolters 142, Jian Xu 143, Xiufeng Xu 43, Kei Yamada 144, Tokiko Yoshida 9, 44, Je-Yeon Yun 145, 146, Mojtaba Zarei 147, Fengrui Zhang 42, Qing Zhao 140, Xi Zhu 148, 149

Affiliation

1. Graduate School of Medical Science, Kyoto Prefectural University of Medicine, Department of Psychiatry, Kyoto City, Japan
2. Bellvitge Biomedical Research Insitute-IDIBELL, Bellvitge University Hospital, Barcelona, Spain
3. Department of Clinical Sciences, Bellvitge Biomedical Research Institute-IDIBELL, CIBERSAM, Bellvitge University Hospital, Barcelona, Spain
4. Department of Clinical Sciences, University of Barcelona, Barcelona, Spain
5. The Margaret and Wallace McCain Centre for Child, Youth & Family Mental Health and Campbell Family Mental Health Research Institute, Centre for Addiction and Mental Health, Toronto, ON, Canada
6. Department of Psychiatry, University of Toronto, Toronto, Ontario
7. Program in Neurosciences and Mental Health, The Hospital for Sick Children, Toronto, ON, Canada
8. Departments of Psychiatry and Neuroscience, Yale University, New Haven, CT
9. Research Center for Child Mental Development, Chiba University, Chiba, Japan
10. The Mathison Centre for Mental Health Research & Education, Hotchkiss Brain Institute, Cumming School of Medicine, University of Calgary, Calgary, AB, Canada
11. Departments of Psychiatry and Medical Genetics, Cumming School of Medicine, University of Calgary, Calgary, AB, Canada
12. McLean Hospital, Belmont, MA, USA
13. Department of Psychiatry, Harvard Medical School, Boston, MA, USA
14. OCD clinic, Department of Psychiatry, National Institute of Mental Health And Neurosciences (NIMHANS), Bangalore, India
15. Laboratory of Neuropsychiatry, Department of Clinical and Behavioral Neurology, IRCCS Santa Lucia Foundation, Rome, Italy
16. Center of Image Diagnostic. Hospital Clínic de Barcelona, Spain
17. Magnetic Resonance Image Core Facility, Institut d'Investigacions Biomèdiques August Pi i Sunyer (IDIBAPS), Spain
18. Magnetic Resonance Image Core Facility, Institut d'Investigacions Biomèdiques August Pi i Sunyer (IDIBAPS), Image Diagnostic Center, Hospital Clinic of Barcelona, Barcelona, Spain
19. Departamento e Instituto de Psiquiatria do Hospital das Clinicas, IPQ HCFMUSP, Faculdade de Medicina, Universidade de Sao Paulo, SP, Brazil
20. Department of Methods and Techniques in Psychology, Pontifical Catholic University, São Paulo, SP, Brazil
21. Vita-Salute San Raffaele University, Milano, Italy
22. Psychiatry & Clinical Psychobiology, Division of Neuroscience, IRCCS Scientific Institute Ospedale San Raffaele, Milano
23. Bellvitge Biomedical Research Institute-IDIBELL, Bellvitge University Hospital, Barcelona, Spain
24. CIBERSAM, Barcelona, Spain
25. Department of Psychiatry, University of British Columbia, Vancouver, Canada
26. Department of Gerontology, Simon Fraser University, Burnaby, Canada
27. Department of Psychology, Humboldt-Universitat zu Berlin, Berlin, Germany
28. Department of Clinical Neuroscience, Centre for Psychiatric Research and Education, Karolinska Institutet, Stockholm, Sweden
29. Department of Medical Psychology, Medical School Hamburg, Hamburg, Germany
30. Amsterdam UMC, Vrije Universiteit Amsterdam, Department of Psychiatry, Department of Anatomy & Neurosciences, Amsterdam Neuroscience, Amsterdam, The Netherlands
31. Department of Women's & Children's Health,Center for Psychiatry Research, Karolinska Institutet, Stockholm, Sweden
32. Bergen Center for Brain Plasticity, Haukeland University Hospital, Bergen, Norway
33. Department of Child and Adolescent Psychiatry and Psychotherapy, University Hospital of Psychiatry Zurich, University of Zurich, Switzerland
34. Neuroscience Center Zurich, University of Zurich and ETH Zurich, Switzerland
35. Amsterdam Neuroscience, Amsterdam, The Netherlands
36. Radboudumc, Department of Cognitive Neuroscience, Nijmegen, The Netherlands
37. Karakter Child and Adolescent Psychiatry University Center, Nijmegen, The Netherlands
38. Department of Child and Adolescent Psychiatria and Psychology. Hospital Clinic of Barcelona. Institute of Neuroscience.
39. Institut d'Investigacions Biomèdiques August Pi i Sunyer (IDIBAPS), Spain
40. Universitat de Barcelona
41. Departamento de Psiquiatria, Hospital das Clinicas HCFMUSP, Faculdade de Medicina, Universidade de Sao Paulo, Sao Paulo, SP, BR.
42. Magnetic Resonance Image Center, First Affiliated Hospital of Kunming Medical University
43. Department of Psychiatry, First Affiliated Hospital of Kunming Medical University
44. United Graduate School of Child Development, Osaka University, Kanazawa University, Hamamatsu University, Chiba University and University of Fukui, Suita, Japan
45. Department of Cognitive Behavioral Physiology, Graduate School of Medicine and School of Medicine, Chiba University, Chiba, Japan
46. Psychiatry Neuroimaging Laboratory, Department of Psychiatry, Brigham and Women's Hospital, Harvard Medical School, Boston, MA, USA
47. Department of Brain and Cognitive Sciences, College of Natural Sciences, Seoul National University, Seoul, Republic of Korea
48. Life and Health Sciences Research Institute (ICVS), School of Medicine, University of Minho, Braga, Portugal
49. ICVS/3B's, PT Government Associate Laboratory, Braga/Guimaraes, Portugal.
50. Clinical Academic Center - Braga, Braga, Portugal
51. Psychiatry & Clinical Psychobiology Unit, Division of Neuroscience, Scientific Institute Ospedale San Raffaele, Milano, Italy
52. SA MRC Unit on Risk & Resilience in Mental Disorders, Department of Psychiatry and Mental Health, University of Cape Town, Cape Town, South Africa
53. Amsterdam UMC, University of Amsterdam, Department of Psychiatry, Amsterdam Neuroscience, Amsterdam, The Netherlands
54. Department of Psychiatry and Behavioral Sciences, Albert Einstein College of Medicine, Bronx, NY, United States
55. Division of Adult Psychiatry, Jane & Terry Semel Institute For Neurosciences, University of California, Los Angeles, CA, USA
56. Department of Psychiatry, University of Michigan Medical School, Ann Arbor, MI
57. Columbia University Medical College, Columbia University, New York, NY, U.S.A.
58. SAMRC Genomics of Brain Disorders Unit, Department of Psychiatry, Cape Town, South Africa
59. Department of Psychiatry, Yale University, New Haven, CT
60. Hospital of Molde, Møre og Romsdal Hospital Trust, Molde, Norway
61. Centre for Crisis Psychology, University of Bergen, Bergen, Norway
62. Highfield Unit Oxford, Warneford Hospital, Warneford Lane, Headington, Oxford, Oxfordshire, OX3 7JX
63. Shanghai Mental Health Center
64. Levvel, academic center for child and adolescent care, Amsterdam, The Netherlands
65. Department of Child and Adolescent Psychiatry, Amsterdam UMC, Amsterdam, The Netherlands
66. Department of Neuropsychiatry, Graduate School of Medical Sciences, Kyushu University
67. Department of Communication Sciences and Disorders, University of Mississippi, MS, USA
68. Department of Psychiatry and Mental Health and Neuroscience Institute, Brain Behaviour Unit, University of Cape Town, Cape Town, South Africa
69. Imaging Genetics Center, Mark and Mary Stevens Neuroimaging and Informatics Institute, Keck School of Medicine of USC, Marina del Rey, California
70. Imaging Genetics Center, Mark and Mary Stevens Institute for Neuroimaging & Informatics, Keck School of Medicine of the University of Southern California, Marina del Rey, U.S.A.
71. Department of Psychiatry University of Oxford, Warneford Hospital, OX3 7JX, UK
72. Department of Psychiatry, University of British Columbia, BC, Canada
73. BC Children's Hospital Research Institute, BC, Canada
74. Amsterdam Neuroscience, Compulsivity, Impulsivity & Attention program, Amsterdam, The Netherlands
75. Department of Neuropsychiatry, Seoul National University Hospital, Seoul, Republic of Korea
76. Department of Psychiatry, Seoul National University College of Medicine, Seoul, Republic of Korea
77. Korea Advanced Institute of Science and Technology, Department of Bio and Brain Engineering, Daejeon, Republic of Korea
78. TUM-Neuroimaging Center (TUM-NIC) of Klinikum rechts der Isar, Technische Universitat Munchen, Germany
79. Department of Diagnostic and Interventional Neuroradiology, School of Medicine, Technical University of Munich
80. Department of Clinical Psychology, University of Bergen, Norway
81. Department of Brain and Cognitive Sciences, Seoul National University College of Natural Science, Seoul, Republic of Korea
82. Department of Brain and Cognitive Sciences, Seoul National University College of Natural Sciences, Seoul, Republic of Korea
83. Institute of Human Behavioral Medicine, SNU-MRC, Seoul, Republic of Korea
84. Department of Child and Adolescent Psychiatry and Psychology, Hospital Clinic, Barcelona, Spain. CIBERSAM
85. Department of Medicine, University of Barcelona, Spain
86. Mental Health Research Networking Center (CIBERSAM), Madrid, Spain
87. Department of Psychiatry, Uijeongbu Eulji Medical Center, Uijeongbu, Republic of Korea
88. SAMRC Unit on Risk & Resilience in Mental Disorders, Department of Psychiatry, Stellenbosch University, Stellenbosch, South Africa
89. Amsterdam UMC, Vrije Universiteit Amsterdam, Department of Psychiatry, Amsterdam Neuroscience, Amsterdam, The Netherlands
90. Graduate School of Systemic Neurosciences (GSN), Ludwig-Maximilians-Universitat
91. Amsterdam UMC, Vrije Universiteit, Department of Psychiatry, Amsterdam Neuroscience, Amsterdam, The Netherlands
92. Department of Basic Clinical Practice, Pharmacology Unit, University of Barcelona, Spain
93. IDIBAPS
94. Centro de Investigación Biomédica en Red de salud mental (CIBERSAM), Spain
95. Chiba University Hospital, Chiba University, Chiba, Japan
96. Department of Clinical Neuroscience, Centre for Psychiatric Research and Education, Karolinska Institutet, Stockholm, Sweden
97. LIM 23, Instituto de Psiquiatria, Hospital das Clinicas da Faculdade de Medicina da Universidade de Sao Paulo, Sao Paulo, Brazil
98. Faculty of Medicine, City University of Sao Paulo, Sao Paulo, Brazil
99. QIMR Berghofer Medical Research Institute, Brisbane, QLD, Australia
100. Anxiety Treatment and Research Clinic, St. Joseph's Hamilton Healthcare, Hamilton, Ontario, Canada
101. Dapartmente of Psychiatry and Behavioural Neurosciences, McMaster University, Hamilton, Ontario, Canada
102. Psychological Neuroscience Lab, CIPsi, School of Psychology, University of Minho, Braga, Portugal
103. Department of Child and Adolescent Psychiatry and Psychology, Hospital Clínic of Barcelona, Spain. CIBERSAM
104. Department of Medicine. University of Barcelona, Spain
105. Texas State University, Austin, TX, USA
106. Department of Psychiatry, Graduate School of Medical Science, Kyoto Prefectural University of Medicine
107. NIH
108. Division of Child and Adolescent Psychiatry, Jane & Terry Semel Institute For Neurosciences, University of California, Los Angeles, CA, USA
109. Department of Psychiatry, Uijeongbu Eulji Medical Center, Uijeongbu, Republic of Korea.
110. University of Illinois at Urbana-Champaign, Champaign, IL, USA
111. ICVS/3B's, PT Government Associate Laboratory, Braga/Guimarães, Portugal
112. Department of Psychology, Yale University, New Haven, CT
113. Child Study Center, Yale University, New Haven, CT
114. Center for Brain and Mind Health, Yale University, New Haven, CT
115. Radboud University Medical Center, Donders Institute for Brain, Cognition and Behavior, Department of Cognitive Neuroscience, Nijmegen, The Netherlands.
116. ATR Brain Information Communication Research Laboratory Group, Kyoto, Japan
117. Department of Psychiatry, Graduate School of Medical Science, Kyoto Prefectural University of Medicine, Kyoto, Japan
118. Center of Mathematics, Computing and Cognition, Universidade Federal do ABC, Santo André, Brazil.
119. Big Data, Hospital Israelita Albert Einstein, São Paulo, Brazil
120. Department of Cognitive Behavioral Physiology, Graduate School of Medicine, Chiba University, Chiba, Japan
121. National Institute of Mental Health and Neurosciences, Department of Integrative Medicine, Bengaluru, India
122. Pediatric OCD Consultation Service, Hamilton, Ontario, Canada
123. Offord Center for Child Studies, McMaster University, Hamilton, Ontario, Canada
124. Department of Social Psychology and Quantitative Psychology, Universitat de Barcelona-UB, Barcelona, Spain
125. Division of Neuropsychiatry, Menninger Department of Psychiatry and Behavioral Science, Baylor College of Medicine, Houston, TX, USA
126. Department of Psychiatry and Mental Health, University of Cape Town, South Africa
127. SAMRC Unit on Risk & Resilience in Mental Disorders, South Africa
128. Department of Psychiatry, New York University School of Medicine, New York, NY
129. Clinical Research, Nathan Kline Institute for Psychiatric Research, Orangeburg, NY
130. Institute of Living, Hartford, CT, USA
131. Yale University School of Medicine, New Haven, USA
132. British Columbia Children's Hospital, Psychiatry, Vancouver, Canada
133. British Columbia Mental Health and Substance Use Services Research Institute, Vancouver, Canada
134. Departments of Psychiatry and Neuroscience, Icahn School of Medicine at Mount Sinai, NY, NY USA
135. Mental Illness Research, Education and Clinical Center, James J. Peters VA Medical Center, Bronx, NY USA
136. Department of Psychiatry, Zhejiang University School of Medicine, Hangzhou, China
137. Imaging Genetics Center, Stevens Neuroimaging & Informatics Institute, Keck School of Medicine, University of Southern California, Marina del Rey, CA, USA
138. Department of Child and Adolescent Psychiatry and Psychotherapy, TU Dresden, Dresden, Germany
139. Amsterdam UMC, Vrije Universiteit Amsterdam, Department of Anatomy & Neurosciences, Amsterdam Neuroscience, Amsterdam, The Netherlands
140. Shanghai Mental Health Center, Shanghai Jiao Tong University School of Medicine
141. Department of Child and Adolescent Psychiatry and Psychotherapy, Faculty of Medicine, Technische Universität Dresden
142. Norwegian University of Science and Technology (NTNU), Faculty of Medicine, Regional Centre for Child and Youth Mental Health and Child Welfare (RKBU Central Norway), Klostergata 46, 7030 Trondheim, Norway
143. Department of Internal Medicine, First Affiliated Hospital of Kunming Medical University
144. Department of Radiology, Graduate School of Medical Science, Kyoto Prefectural University of Medicine
145. Seoul National University Hospital, Seoul, Republic of Korea
146. Yeongeon Student Support Center, Seoul National University College of Medicine, Seoul, Republic of Korea
147. Institute of Medical Science and Technology, Shahid Beheshti University, Tehran, Iran
148. Department of Psychiatry, Columbia University Irving Medical Center, New York, USA
149. New York State Psychiatric Institute, New York, USA
