# Supplementary material for: White matter diffusion estimates in obsessive-compulsive disorder across 1,653 individuals: Machine learning findings from the ENIGMA OCD Working Group
Source: Research Square preprint supplement (doi:10.21203/rs.3.rs-2749722/v1), 2023-06-30
Supplement: Supplementary file 2 [file d216541f73b7fe2a74140f30.pdf]

**(A) Adult sample**

**(B) Adult sample, NeuroComBat**

### (C) Pediatric sample

|                                                                                                                                                                  | OCD (N = 175)<br>vs. HC (N = 142) |                 | unmedicated OCD (N = 105)<br>vs. HC (N = 142) |                 | unmedicated OCD (N = 105)<br>vs. medicated OCD (N = 70) |                 |
|------------------------------------------------------------------------------------------------------------------------------------------------------------------|-----------------------------------|-----------------|-----------------------------------------------|-----------------|---------------------------------------------------------|-----------------|
|                                                                                                                                                                  | Discovery set                     | Replication set | Discovery set                                 | Replication set | Discovery set                                           | Replication set |
| ROC-AUC                                                                                                                                                          | 69.54 ± 8.59                      | 59.8 ± 7.39     | 65.96 ± 12.33                                 | 48.51 ± 10.14   | 61.82 ± 15.50                                           | 72.45 ± 8.87    |
| Accuracy (%)                                                                                                                                                     | 73.56 ± 6.82                      | 62.5 ± 6.38     | 69.15 ± 8.35                                  | 57.9 ± 8.06     | 69.15 ± 11.18                                           | 74.3 ± 5.83     |
| Sensitivity (%)                                                                                                                                                  | 73.25 ±17.25                      | 65.71 ± 16.03   | 73.43 ± 14.12                                 | 50 ± 25.51      | 73.43 ± 12.74                                           | 95.24 ± 2.43    |
| Specificity (%)                                                                                                                                                  | 73.03 ± 13.18                     | 58.62 ± 20.58   | 68.75 ± 9.90                                  | 62.5 ± 19.13    | 68.75 ± 15.95                                           | 42.86 ± 29.15   |
| For the classification of medication status among OCD patients, some sites (i.e., Calgary) containing only unmedicated OCD were excluded from the discovery set. |                                   |                 |                                               |                 |                                                         |                 |

For the classification of medication status among OCD patients, some sites (i.e., Calgary) containing only unmedicated OCD were excluded from the discovery set.
